# Supplementary material for: Genome-Wide Analysis of Acute Endurance Exercise-Induced Translational Regulation in Mouse Skeletal Muscle
Source: PLOS journal article supplement (doi:10.1371/journal.pone.0148311), 2016-02-04
Supplement: S1 (10.1371/journal.pone.0148311.s001) [file journal.pone.0148311.s001]

Biological replicate 1 ( $\log_2\text{RPM}$ )

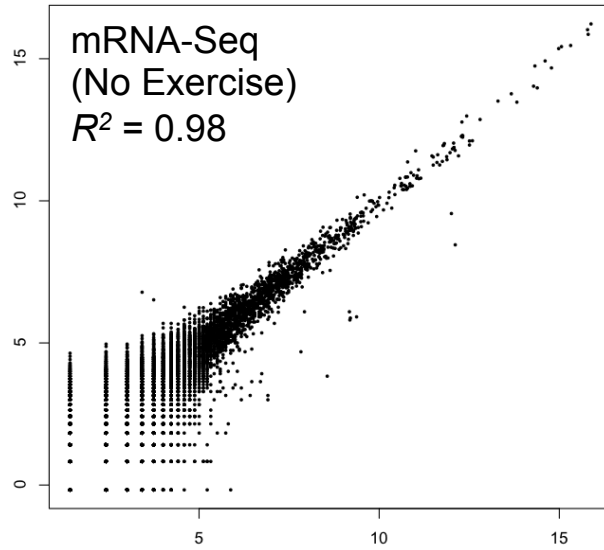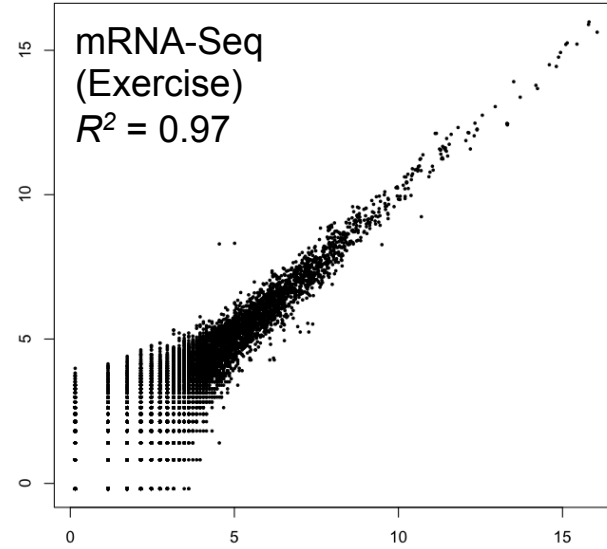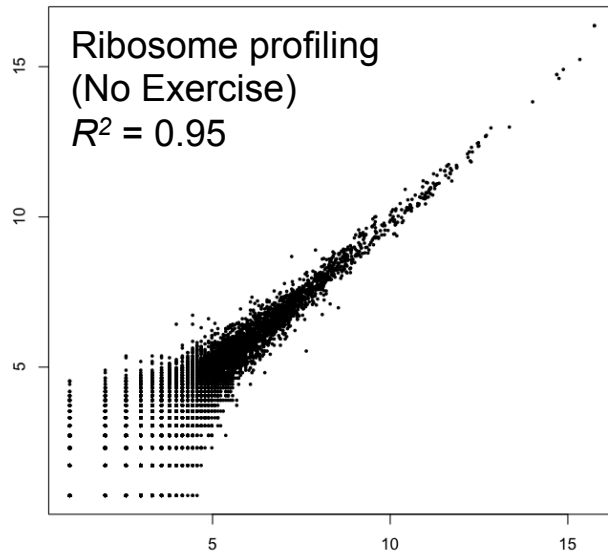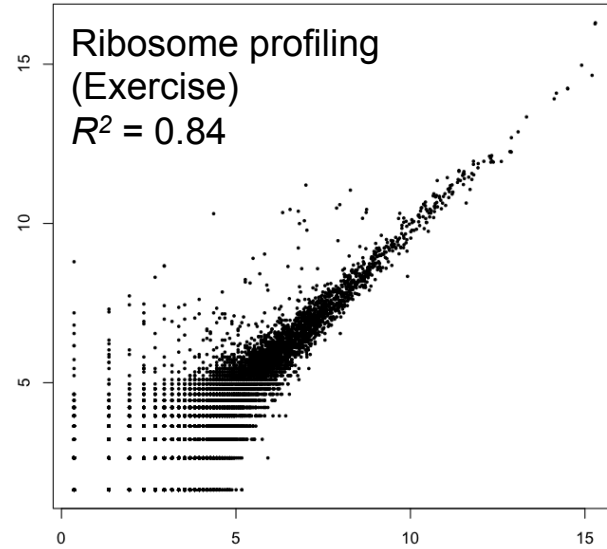

Biological replicate 2 ( $\log_2\text{RPM}$ )
