# Supplementary material for: Genome-Wide Analysis of Acute Endurance Exercise-Induced Translational Regulation in Mouse Skeletal Muscle
Source: PLoS One. 2016 Feb 4;11(2):e0148311. doi: 10.1371/journal.pone.0148311 (PMC4742069; doi:10.1371/journal.pone.0148311)
Supplement: S4 Table — (XLSX) [file pone.0148311.s007.xlsx]

## Sheet: Sheet1
Supplementary Table 4. Gene ontology enrichment in the known TOP motif genes that expressed in the current study (> 125 RPM).
Molecular Facntion/Biological Pathway	Enrichment Score
structural constituent of ribosome	68.66
translational elongation	5.71
translational initiation	2.93
ribosome biogenesis	1.48
